# Supplementary material for: Rapid and efficient sequestration of arsenic from contaminated water using hypertolerantBacillusL-148 sp.: a two-step process
Source: Royal Society of Chemistry journal article supplement (doi:10.1039/c9gc00878k), 2019-01-01
Supplement: c9gc00878k1.pdf [file c9gc00878k1.pdf]

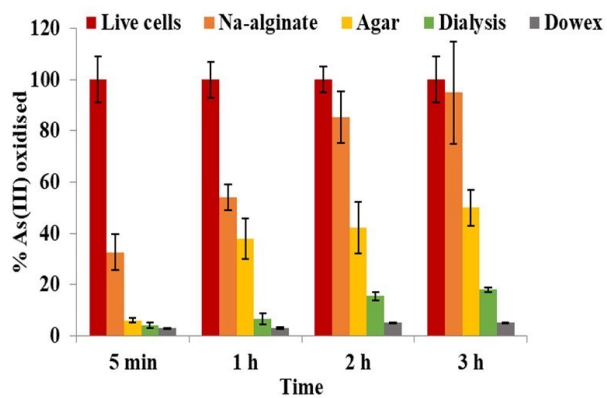

Supplementary Fig. 1: Rate of As(III) oxidation by different forms of cells. Live cells without any pre-treatment were the fastest As(III) oxidisers against the other form of cells.
