# Supplementary material for: Rapid and efficient sequestration of arsenic from contaminated water using hypertolerantBacillusL-148 sp.: a two-step process
Source: Royal Society of Chemistry journal article supplement (doi:10.1039/c9gc00878k), 2019-01-01
Supplement: c9gc00878k3.pdf [file c9gc00878k3.pdf]

Supplementary Table 1: Time required for complete As(III) oxidation by *Bacillus* sp. L-148 in the bioreactor.

| As(III) mM | Time  |
|------------|-------|
| 1          | 5 min |
| 5          | 9 h   |
| 10         | 12 h  |
| 15         | 18 h  |
| 20         | 24 h  |
| 30         | 72 h  |
| 40         | 120 h |
| 50         | 144 h |
